# Supplementary material
Source: publisher figshare collection journal article supplement (https://gsapubs.figshare.com/ndownloader/files/23297537)
Supplement: Supplementary file 1 [file 23297537]

## Sheet: Sheet1
TABLE DR3: WHOLE-ROCK ANALYSES OF UNALTERED SILICICLASTIC METASEDIMENTARY ROCKS OF THE NOME COMPLEX, SEWARD PENINSULA, ALASKA
Sample No.	Location(1)		Lithology	SiO2	Al2O3	Fe2O3T	MnO	MgO	CaO	Na2O	K2O	TiO2	P2O5	LOI	Total	F	C-Total	C-Graphitic	C-Organic	TOC	CO2	Total S	SO4	Be	V	Cr	Sc	Ni	Co	Cu	Zn	Ag	Pb	Hg	Au	As	Se	Sb	Ga	Ge	Rb	Sr	Zr	Nb	Mo	Sn	Cs	Ba	Bi
	Latitude	Longitude		wt %	wt %	wt %	wt %	wt %	wt %	wt %	wt %	wt %	wt %	wt %	wt %	wt %	wt %	wt %	wt %	wt %	wt %	wt %	wt %	ppm	ppm	ppm	ppm	ppm	ppm	ppm	ppm	ppm	ppm	ppb	ppb	ppm	ppm	ppm	ppm	ppm	ppm	ppm	ppm	ppm	ppm	ppm	ppm	ppm	ppm
JS-04-2B	64 37.71	165 18.23	graphitic calc phyllite	57.85	14.99	7.26	0.068	2.16	3.11	0.24	3.43	0.823	0.16	9.86	99.96	0.1	2.31	0.59	0.1	0.69	7.16	1.06	0.97	3	172	106	14.4	72	19	45	117	0.5	23	5	9	49.4	< 3	22.8	21	1.7	159	88	171	14.6	4	4	5	857	3
JS-04-6A	64 51.23	163 53.17	pelitic schist	68.96	14.6	6.85	0.053	2.34	0.24	0.81	2.42	0.933	0.17	3.02	100.4	0.08	0.09	0.06	< 0.05	< 0.05	< 0.01	0.06	< 0.05	2	150	91	14.5	68	21	26	117	< 0.3	8	6	5	9.5	< 3	0.6	20	2.8	123	34	283	16.3	< 2	3	5.1	473	3.1
JS-04-6B	64 51.23	163 53.17	pelitic schist	42.23	29.95	11.23	0.104	3.12	0.16	0.53	5.91	1.715	0.11	5.34	100.4	0.11	0.21	0.16	< 0.05	0.16	< 0.01	0.05	< 0.05	5	303	169	24	91	29	54	178	< 0.3	27	< 5	5	10.8	< 3	0.7	39	6.5	285	56	381	29	< 2	6	11.7	1131	8.7
JS-04-9	64 48.40	164 11.32	graphitic siltstone	91.55	3.62	1.43	0.005	0.52	0.05	0.08	0.85	0.181	0.06	1.76	100.1	0.06	0.6	0.56	< 0.05	0.56	< 0.01	0.01	< 0.05	1	144	24	3.5	38	4	22	34	< 0.3	9	< 5	7	14.9	< 3	1.8	5	1.8	31	28	37	2.7	5	4	1.4	888	0.3
JS-04-14A	64 54.57	164 02.64	pelitic schist	51.73	22.78	9.8	0.062	3.41	0.25	1.04	4.67	1.283	0.17	5.04	100.2	0.11	0.19	0.16	0.06	0.22	< 0.01	0.01	< 0.05	4	219	138	21.4	94	31	50	177	0.3	17	6	< 2	19.2	< 3	4.8	32	3.4	236	79	292	22.5	< 2	5	16.3	921	3.6
JS-04-14B	64 54.57	164 02.64	quartz-rich pelitic schist	68.58	13.34	7.51	0.066	2.54	0.95	0.58	2.29	0.972	0.21	3.93	100.9	0.09	0.24	0.09	0.73	0.82	0.51	< 0.01	< 0.05	2	130	113	13.4	71	16	26	127	< 0.3	13	< 5	4	15.9	< 3	5.3	17	3	107	41	304	15.1	< 2	3	7.4	450	3.2
JS-04-16	65 13.94	163 59.74	pelitic schist	71.26	14.15	6.32	0.134	1.91	1.83	1.16	1.79	0.914	0.4	0.86	100.7	0.09	0.01	< 0.05	< 0.05	< 0.05	< 0.01	< 0.01	< 0.05	3	147	135	13.6	62	19	8	76	< 0.3	25	< 5	< 2	1.2	< 3	0.4	20	3	119	72	215	13.3	< 2	7	19.7	373	1.9
JS-04-17A	64 43.57	163 57.95	graphitic quartzite	89.77	5.84	0.29	0.003	0.38	0.01	0.07	0.85	0.345	0.02	3.05	100.6	0.07	1.64	1.34	< 0.05	1.34	< 0.01	0.01	< 0.05	2	205	32	5	8	< 1	4	26	0.5	12	45	4	3.2	< 3	0.6	8	2.4	34	29	90	4.5	3	2	3.1	7669	0.3
JS-04-17B	64 43.57	163 57.95	graphitic phyllite	89.18	5.26	0.29	0.005	0.34	0.02	0.12	0.62	0.203	0.02	2.7	98.76	0.06	1.33	1.28	< 0.05	1.28	< 0.01	0.01	< 0.05	2	133	71	4.2	4	< 1	8	20	2.4	16	392	4	2.7	< 3	1.5	7	2	27	36	117	6.9	3	4	3.5	7137	< 0.1
JS-05-72	65 04.49	162 32.39	graphitic chert	93.17	2.18	0.85	0.008	0.54	0.13	0.29	0.48	0.095	0.04	2.96	100.7	0.02	2.13	2.03	0.16	2.19	< 0.01	0.09	< 0.05	1	220	120	2.5	60	3	18	86	< 0.3	3	< 5	11	3	< 3	1.1	4	1.3	16	49	26	1.5	13	3	1.2	2800	< 0.1
JS-05-73-1	65 05.72	162 32.72	graphitic calc argillite	50.07	2.05	0.79	0.022	0.89	24.13	0.23	0.44	0.111	0.04	20.89	99.66	0.02	7.06	2.02	< 0.05	2.02	14.8	0.03	0.06	1	113	16	3	27	1	11	19	1	3	< 5	5	2.5	< 3	1.5	3	1	10	736	24	1.4	5	2	0.2	5793	0.1
JS-05-73-2	65 05.72	162 32.72	graphitic argillite	73.64	4.8	1.51	0.023	1.72	1.7	0.53	1.03	0.229	0.08	10.84	96.11	0.05	3.39	2.73	0.23	2.96	0.08	0.01	< 0.05	2	173	38	4.4	83	6	27	89	< 0.3	16	9	10	6.8	< 3	2.5	7	1.5	20	544	44	2.9	12	1	0.2	13720	< 0.1
JS-06-8A	64 35.02	164 05.41	calcareous quartzite	57.54	8.73	6.28	0.122	2.11	12.01	0.92	0.24	0.611	0.17	11.52	100.2	0.04	2.82	0.07	0.22	0.29	10.1	< 0.01	< 0.3	2	92	101	7.7	40	14	30	60	< 0.5	13	< 5	< 2	7.1	< 3	0.6	11	0.7	9	345	165	7.4	< 2	1	0.4	42	0.2
JS-06-8B	64 35.02	164 05.41	pelitic schist	67.43	14.07	7.19	0.081	2.6	0.71	0.38	2.71	0.865	0.3	3.66	99.98	0.08	0.25	0.1	0.1	0.2	0.29	0.01	< 0.3	3	134	86	13.7	40	16	20	80	< 0.5	3	5	9	5.6	< 3	0.9	18	1.1	128	64	225	12.6	< 2	3	5.8	460	< 0.1
JS-06-9	64 41.65	165 23.21	dolomitic pelite	59.39	10.27	5	0.068	3.62	8.84	0.13	2.08	0.651	0.15	10.74	100.9	0.06	2.54	0.1	0.12	0.22	8.82	0.01	< 0.3	2	77	102	9	40	10	20	90	< 0.5	10	< 5	< 2	10.5	< 3	0.7	14	1.4	93	111	242	10.7	< 2	2	3.2	317	0.1
JS-06-10	64 42.18	165 22.86	dolomitic pelite	59.58	8.93	4.38	0.083	3.13	10.06	1.52	1.03	0.613	0.15	10.53	100	0.05	2.61	0.13	0.22	0.35	9.14	0.01	< 0.3	2	68	71	7.7	30	9	5	60	< 0.5	7	< 5	< 2	13.5	< 3	0.9	11	1.1	45	169	245	8.8	< 2	2	1.8	160	< 0.1
JS-06-11	64 37.91	165 27.35	metagraywacke	76.56	9.27	3.86	0.048	1.69	1.64	1.3	1.59	0.777	0.18	3.01	99.94	0.05	0.49	0.14	< 0.05	0.14	1.13	0.03	< 0.3	2	61	96	7.6	< 20	10	5	50	< 0.5	3	< 5	< 2	4.2	< 3	0.8	11	0.9	66	104	298	11.1	< 2	2	2.1	296	< 0.1
JS-06-12A	64 36.30	165 26.04	dolomitic metagraywacke	44.13	9.35	5.61	0.276	5.85	13.1	0.08	1.05	0.624	0.17	19.07	99.31	0.04	4.74	< 0.05	0.19	0.19	16.5	0.26	< 0.3	1	96	70	11	30	16	40	50	< 0.5	20	< 5	< 2	19	< 3	1.1	12	1.4	38	368	141	8.5	< 2	2	1.4	238	0.3
(1) Location is given in degrees and decimal minutes (NAD 27). Longitude is in degrees west; this number should be expressed as negative in GIS.
[truncated: 21 more columns]
